# Supplementary material for: Genome-wide identification and expression profiling reveal tissue-specific expression and differentially-regulated genes involved in gibberellin metabolism between Williams banana and its dwarf mutant
Source: PubMed Central journal article supplement (PMC4884393; doi:10.1186/s12870-016-0809-1), 2016-05-27
Supplement: 12870_2016_809_MOESM1_ESM.pdf [file 12870_2016_809_MOESM1_ESM.pdf]

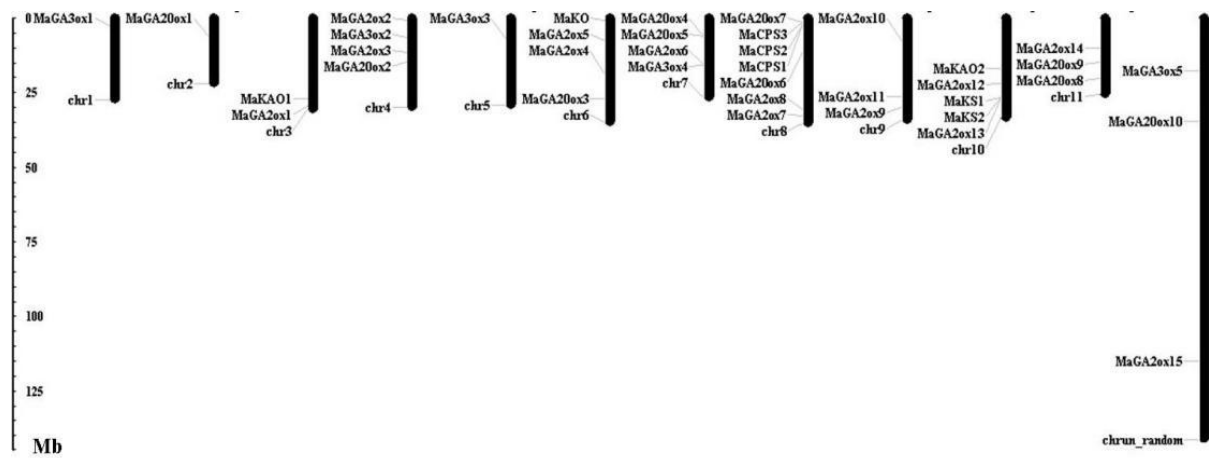

**Fig.S1.** Chromosomal locations of 38 banana candidate genes on the banana

A genome
