# Supplementary material for: Genome-wide identification and expression profiling reveal tissue-specific expression and differentially-regulated genes involved in gibberellin metabolism between Williams banana and its dwarf mutant
Source: PubMed Central journal article supplement (PMC4884393; doi:10.1186/s12870-016-0809-1), 2016-05-27
Supplement: 12870_2016_809_MOESM2_ESM.pdf [file 12870_2016_809_MOESM2_ESM.pdf]

Table S1. The accession numbers of protein sequences cited in this study

| Gene name | Accession number |
|-----------|------------------|
| AtCPS     | NP_192187        |
| AtKO      | NP_197962        |
| AtKS      | NP_178064        |
| AtKAO1    | NP_172008        |
| AtKAO2    | NP_001189657     |
| AtGA20ox1 | NP_194272        |
| AtGA20ox2 | NP_199994        |
| AtGA20ox3 | NP_196337        |
| AtGA20ox4 | NP_176294        |
| AtGA20ox5 | NP_175075        |
| AtGA2ox1  | CAB41007         |
| AtGA2ox2  | CAB41008         |
| AtGA2ox3  | CAB41009         |
| AtGA2ox4  | AAG51528         |
| AtGA2ox6  | AAG00891         |
| AtGA2ox7  | AAG50945         |
| AtGA2ox8  | CAB79120         |
| AtGA3ox1  | AAO64762         |
| AtGA3ox2  | NP_178150        |
| AtGA3ox3  | NP_193900        |
| AtGA3ox4  | NP_178149        |
| OsCPS     | BAS78107         |
| OsKO      | BAS98310         |
| OsKS      | BAS90962         |
| OsKAO     | BAS95781.1       |
| OsGA20ox1 | BAF13865         |
| OsGA20ox2 | BAJ09478         |
| OsGA20ox3 | BAF20901         |
| OsGA20ox4 | BAH93154         |
| OsGA20ox5 | XP_015628260     |
| OsGA20ox6 | XP_015633778     |
| OsGA20ox7 | XP_015648463     |
| OsGA20ox8 | XP_015635293     |
| OsGA2ox1  | BAB40934         |
| OsGA2ox2  | BAC16751         |
| OsGA2ox3  | BAC16752         |
| OsGA2ox4  | AAU03107         |
| OsGA2ox5  | BAF20604         |
| OsGA2ox6  | CAE03751         |
| OsGA2ox7  | XP_015633380     |
| OsGA2ox8  | XP_015638414     |
| OsGA2ox9  | XP_015624176     |
| OsGA2ox10 | AAT01379         |

|           |                |
|-----------|----------------|
| OsGA2ox1  | BAF14632       |
| OsGA3ox1  | NP_001054798   |
| OsGA3ox2  | NP_001042186   |
| ZmCPS/AN1 | NP_001105329.1 |
| ZmKO      | NP_001141872   |
| ZmKS      | XP_008668898.1 |
| ZmKAO     | NP_001105586   |
| GmCPS1    | XP_006604437.1 |
| GmKO      | XP_003543711.2 |
| GmKS1     | XP_006585394.1 |
| GmKS2     | XP_006585395.1 |
| GmKAO     | XP_003546291.1 |

---
