# Supplementary material for: Genome-wide identification and expression profiling reveal tissue-specific expression and differentially-regulated genes involved in gibberellin metabolism between Williams banana and its dwarf mutant
Source: PubMed Central journal article supplement (PMC4884393; doi:10.1186/s12870-016-0809-1), 2016-05-27
Supplement: 12870_2016_809_MOESM3_ESM.pdf [file 12870_2016_809_MOESM3_ESM.pdf]

**Table S2.** Primer sequences of the reference gene and GA metabolism genes for qRT-PCR in this study

| Gene              | Entry name                    | Forward primer (5'→3')   | Reverse primer (5'→3')   |
|-------------------|-------------------------------|--------------------------|--------------------------|
| Actin             | AB022041                      | GCCATACAGTGCCAATCTACGAGG | ATGTCACGAACAATTTCCCGCTCA |
| <i>MaCPS3</i>     | GSMUA_Achr8T31530_001         | AAAGCTGTGCAGGGAGGTT      | CTTGGTGTGGTGGTTGAGG      |
| <i>MaKO1</i>      | GSMUA_Achr6T00910_001         | GAGGAACCCGAAGAATGGA      | ACGCAAGAAATCAGCATCG      |
| <i>MaKSI</i>      | GSMUA_Achr10T20910_001        | GGTTGAGAAGTGGATGGAA      | ATGCAGATGCCCTAATACCG     |
| <i>MaKA01</i>     | GSMUA_Achr3T27540_001         | AGCAGGTTATGCCCTGGAA      | CCATGCAATTGTCCGTAGG      |
| <i>MaGA20ox1</i>  | GSMUA_Achr2T01010_001         | GAAGGAAACCCTCTCGTTCC     | ATCCGAGCACCTCATTATCT     |
| <i>MaGA20ox2</i>  | GSMUA_Achr4T16380_001         | CCTCTCTGTACAAGCTACGC     | AAATCAGGGCCTAAGATGGAA    |
| <i>MaGA20ox3</i>  | GSMUA_Achr6T25910_001         | ATGAGGTGCAACAGCTACCC     | TCTTGTACCTCCCGTTGGAC     |
| <i>MaGA20ox4</i>  | GSMUA_Achr7T08230_001         | GGCGGAGAACACCAAGAAT      | TGGCCTGAGCGTACTCAAC      |
| <i>MaGA20ox5</i>  | GSMUA_Achr7T08240_001         | ACTGGAAGGAGGTGTTCTGACT   | TTAAGCTGGTCTGGTCTTGA     |
| <i>MaGA20ox6</i>  | GSMUA_Achr8T19120_001         | CATCGTGGAGGACTACATCGT    | CTCGAAGAACTCACGGAAAGTG   |
| <i>MaGA20ox7</i>  | GSMUA_Achr8T32560_001         | TGGCCCTCGATAAAGAGAGA     | GTCTACGACAGGGGAGTCCA     |
| <i>MaGA20ox8</i>  | GSMUA_Achr11T11840_001        | TGAGGATGGGAAGGGACTACT    | CATGAAGTGTGCGCTATGTT     |
| <i>MaGA20ox9</i>  | GSMUA_Achr11T18740_001        | GCCACGGTTTCTTCCAAC       | CCAGCACGGAGACGAAGTA      |
| <i>MaGA20ox10</i> | GSMUA_AchrUn_randomT21840_001 | TGGAAGGAGACCTTCACGTT     | TTATCTGCAGCGACAGGTTG     |
| <i>MaGA3ox2</i>   | GSMUA_Achr4T08970_001         | CATCTCTGCTTCTTCTC        | CTTCATCTCGTCGCTATA       |
| <i>MaGA3ox3</i>   | GSMUA_Achr5T09790_001         | CGCCTTCTGTGACGTAATAG     | GAGCATCATCCGCATCAA       |
| <i>MaGA3ox4</i>   | GSMUA_Achr7T13240_001         | GATATGGCATCGCTAACA       | CATCCAACCTTGTGATTCC      |
| <i>MaGA3ox5</i>   | GSMUA_AchrUn_randomT03870_001 | CCTCTCTACTCCAATA         | GCCTGTATATTCTTCCATC      |
| <i>MaGA2ox1</i>   | GSMUA_Achr3T31410_001         | AAGGTGCTTGAAGTATG        | ATGGAGGATAGTGGTTGA       |
| <i>MaGA2ox3</i>   | GSMUA_Achr4T15110_001         | ATACTTATCAGCCGTCAG       | TGGAGGATAGTGATTGAG       |
| <i>MaGA2ox4</i>   | GSMUA_Achr6T21950_001         | CGACAACAGGTAAAGATG       | GGAAGACACAGGAATATG       |
| <i>MaGA2ox5</i>   | GSMUA_Achr6T26900_001         | TTCAGCAGGTTAGTGATG       | CTCCAGAATAGGGCATT        |
| <i>MaGA2ox6</i>   | GSMUA_Achr7T13930_001         | CATATCAGCAGTCAGGAA       | CTCAAGACCGAATCACTC       |
| <i>MaGA2ox7</i>   | GSMUA_Achr8T03660_001         | ATTCACACGGACCTAATC       | ATGCTTCTATATGGAGAGG      |
| <i>MaGA2ox8</i>   | GSMUA_Achr8T27270_001         | GTGCCATGATCTACTTC        | GTGAACCTCTGTACTTG        |
| <i>MaGA2ox9</i>   | GSMUA_Achr9T06460_001         | TTGAACTGATAGCCGAAG       | GCATCTGGGATAGTGATT       |
| <i>MaGA2ox10</i>  | GSMUA_Achr9T11880_001         | CAATACCTGCTCAAGTGT       | TAACAGTGAACCATCTCC       |
| <i>MaGA2ox11</i>  | GSMUA_Achr9T21260_001         | TCATCAGGATCAAGTAGG       | CTTCGTATTGGTCATCAC       |
| <i>MaGA2ox12</i>  | GSMUA_Achr10T13090_001        | TCCGAGTCATACAAGAGT       | GAAGTAGCAGAGTGAGATT      |
| <i>MaGA2ox13</i>  | GSMUA_Achr10T21600_001        | GTCGGTGATTCCTTACAG       | CGAGACTTGAGACCATTG       |
| <i>MaGA2ox14</i>  | GSMUA_Achr11T14320_001        | TACCTTCTTCCATTCC         | CACTTGCTTACATACTC        |
| <i>MaGA2ox15</i>  | GSMUA_AchrUn_randomT06450_001 | GCCACATCTTTCATCAG        | ATAGCAACTACCCTTCTCT      |
